# Supplementary material
Source: MDPI journal article supplement (https://www.mdpi.com/2071-1050/14/5/2672)
Supplement: s1 [file s1]

Table S1 Leaf nutrients concentration in oil palm plantations of two locations

| Parameters               | Location 1 |         |       |      | Location 2 |         |       |      |
|--------------------------|------------|---------|-------|------|------------|---------|-------|------|
|                          | Minimum    | Maximum | Mean  | SD   | Minimum    | Maximum | Mean  | SD   |
| N (%)                    | 0.16       | 3.17    | 1.85b | 0.43 | 0.62       | 2.84    | 2.09a | 0.38 |
| P (%)                    | 0.04       | 0.18    | 0.11a | 0.02 | 0.04       | 0.20    | 0.12a | 0.03 |
| K (%)                    | 0.21       | 0.98    | 0.54b | 0.13 | 0.34       | 1.04    | 0.68a | 0.14 |
| Ca (%)                   | 1.23       | 2.23    | 1.65a | 0.22 | 0.66       | 2.66    | 1.36b | 0.32 |
| Mg (%)                   | 0.10       | 0.86    | 0.49a | 0.19 | 0.10       | 1.03    | 0.47a | 0.18 |
| S (%)                    | 0.08       | 0.22    | 0.16a | 0.03 | 0.09       | 0.35    | 0.18a | 0.04 |
| B (mg kg <sup>-1</sup> ) | 21.8       | 48.3    | 35.8a | 11.4 | 9.55       | 44.4    | 27.5b | 14.3 |

Note: SD = standard deviation, N = nitrogen, P = phosphorus, K = potassium, Ca = calcium, Mg = magnesium, S = sulphur. B = boron

Table S2 Leaf nutrients concentrations in high and low yielding oil palm plantations of both the locations

| Parameters               | High yielding oil palm plantations |         |       |      | Low yielding oil palm plantations |         |       |      |
|--------------------------|------------------------------------|---------|-------|------|-----------------------------------|---------|-------|------|
|                          | Minimum                            | Maximum | Mean  | SD   | Minimum                           | Maximum | Mean  | SD   |
| Location 1               |                                    |         |       |      |                                   |         |       |      |
| N (%)                    | 1.69                               | 2.18    | 1.89a | 0.16 | 0.16                              | 3.17    | 1.84a | 0.50 |
| P (%)                    | 0.04                               | 0.14    | 0.10a | 0.02 | 0.05                              | 0.18    | 0.11a | 0.02 |
| K (%)                    | 0.21                               | 0.98    | 0.54a | 0.19 | 0.34                              | 0.84    | 0.54a | 0.11 |
| Ca (%)                   | 1.34                               | 1.83    | 1.59a | 0.16 | 1.23                              | 2.22    | 1.67a | 0.23 |
| Mg (%)                   | 0.10                               | 0.86    | 0.47a | 0.21 | 0.09                              | 0.84    | 0.49a | 0.19 |
| S (%)                    | 0.08                               | 0.22    | 0.16a | 0.03 | 0.10                              | 0.22    | 0.16a | 0.03 |
| B (mg kg <sup>-1</sup> ) | 29.0                               | 48.3    | 32.5b | 9.45 | 21.8                              | 44.4    | 38.1a | 12.0 |
| Location 2               |                                    |         |       |      |                                   |         |       |      |
| N (%)                    | 0.62                               | 2.72    | 2.10a | 0.40 | 1.02                              | 2.84    | 2.08a | 0.36 |
| P (%)                    | 0.04                               | 0.20    | 0.12a | 0.03 | 0.05                              | 0.19    | 0.13a | 0.03 |
| K (%)                    | 0.46                               | 1.05    | 0.68a | 0.14 | 0.34                              | 0.99    | 0.67a | 0.13 |
| Ca (%)                   | 0.66                               | 2.66    | 1.30b | 0.34 | 0.89                              | 2.08    | 1.47a | 0.27 |
| Mg (%)                   | 0.09                               | 0.94    | 0.48a | 0.17 | 0.17                              | 1.03    | 0.46a | 0.19 |
| S (%)                    | 0.09                               | 0.35    | 0.18a | 0.05 | 0.11                              | 0.27    | 0.17a | 0.03 |
| B (mg kg <sup>-1</sup> ) | 11.2                               | 44.4    | 31.4a | 14.1 | 9.55                              | 35.2    | 22.2b | 13.3 |

Note: SD = standard deviation, N = nitrogen, P = phosphorus, K = potassium, Ca = calcium, Mg = magnesium, S = sulphur. B = boron
